# Supplementary material
Source: publisher figshare collection journal article supplement (https://gsajournals.figshare.com/ndownloader/files/30643008)
Supplement: Supplementary file 1 [file 30643008]

## Sheet: miRNA_candidates
Proposed name	Chromosome	Origin	Feature	Start	End		Strand		ID	Name	miRNA_seq	Len_miR1	miRNA2_seq	Len_miR2	PrecTrsor_seq	Prec Length	Location
Candidate1	chr1	ShortStack	Cluster_2366	11646330	11646536	.	-	.	ID=Cluster_2366	NAME=New	CGCGGCTCCGTCGACTGGTGC	21	GCCTTTCGTCGGATTCGCGTG	21	TCGGGTCCGCTGCGCCTCCTCGCTCGCTTGTCGGCGTTGGAGGCCCGTCGCCGTGCCGGTTTTGGACGCTCGTGCGCGTCCGCGTCCGCGTCCGCGCCCGCCTCGCGAAGGACACCGACGAGCACCAGTCGACGGAGCCGCGCGCAACCTTGATCTGCACGCGAATCCGACGAAAGGCGCCCACCGGCGTCGTTCTCTTCCGCCGCT	207	Intergenic	41612940
miR9863	chr1			53259476	53259689	.	+	.		NAME=miR9863	UGUUAUGAUCUGCUUCUCAUC	21	TGAGAAGGTAGATCATAATAGC	22	TTGTCGCTCAATTGTTATGATCTGCTTCTCATCTGAAGACTAGTTTATTACATATAAGCATATTTTTGAAAGTTTGAGAGAGAGATCACAAGCAGATCCCGTGCAGAAGGGAACATCATTGCTACAACTACAATAATTCTTCCACTTCAAGAGCCATTGGGCCGCTAAACAAGTCTTTAGATGAGAAGGTAGATCATAATAGCTGAGCGAAAT	213	Intergenic	79060933
Candidate2	chr1	miR-PREFeR	miRNA-precursor_67	132320622	132320730	.	-	.	ID=miRNA-precursor_67	NAME=New	AAGTGGAACCAGAAGTGGAGG	21	TCCACTTCTGGTTCCACTTCT	21	GGGCAGCGGCGGAGAAGTGGAACCAGAAGTGGAGGTCAACATATTACACGCAGGCATCACCTGTAATATGTTGACCTCCACTTCTGGTTCCACTTCTCCGCCACTGCCA	109	Intronic	128583121
miR166a	chr1	ShortStack	Cluster_16616	260903851	260904000	.	+	.	ID=Cluster_16616	NAME=miR166a-5p	TCGGACCAGGCTTCATTCCCC	21	GGAATGTTGTCTGGTTCAAGG	21	GCTAGAGGTAGAGGATGAGAGGATATGAAGCTATTTTGCTTCTGGGTGGAATGTTGTCTGGTTCAAGGTCTCGCTCTGGTTTGAGGATGGAAACCTTTCATTTCTCTCAGCTTCCTGCGATCTCGGACCAGGCTTCATTCCCCTCAGAGA	150	Intergenic	38356984
miR171a	chr1	ShortStack	Cluster_18199	299260984	299261073	.	+	.	ID=Cluster_18199	NAME=miR171a	TATTGGCTCGGCTCACTCAGG	21	TGATTGAGCCGCGCCAATATC	21	GCTGCGGTATTGGCTCGGCTCACTCAGGTCATCGTGTTGCAGAAGCATATGCTTCTCGGTATAATCTGATTGAGCCGCGCCAATATCTCA	90	Intergenic	58578761
Candidate3	chr1	ShortStack	Cluster_21906	357839834	357840009	.	-	.	ID=Cluster_21906	NAME=New	ACCGGATCTCCTGCTCGACGG	21	GTCTAGCAGTAGATCCGGTGC	21	GCATTCAGAATTTCAGATGGAGGATCCTTGGTCAGCCTCGCAATGAAATAAAGCAGATCCTTGGAAGCAGTTCACGCGGCTACGCGAAGGGGAGCGCGCACCGGATCTACTGCTAGACGGGCACGGCCGCCGCGGCCCGTCGAGCAGGAGATCCGGTGCTAGCTCTGCTTCCGCGG	176	Intergenic	45534393
miR164a	chr1	ShortStack	Cluster_25073	403374402	403374571	.	+	.	ID=Cluster_25073	NAME=miR164b-3p	CATGTGCCTTTCTTCTCCACC	21	TGGAGAAGCAGGGCACGTGCA	21	GCGAGGTGGAGAAGCAGGGCACGTGCATTCATTTCCAGCTCGGTTCCCGGCGTCCGGCCGGCTGGCTGGCACGCACCGCCCCGGCCTTTCCTGGCTAGTGTGTCGCTCGATCCGGCCGTGCGCCGGCGGCCGGCCCATGCATGCATGTGCCTTTCTTCTCCACCGTGCAC	170	Intergenic	56233404
Candidate4	chr1	miR-PREFeR	miRNA-precursor_160	459607975	459608057	.	-	.	ID=miRNA-precursor_160	NAME=New	GTGCCTTTCGCCGGAGTCCCG	21	AGGCTCCGTCGAGATGTGCTC	21	GGGCACGGACGAGCACATCTCGACGGAGCCTCGCGCAGGTCAAAGCCGCACGGGACTCCGGCGAAAGGCACTCACCGGCGCCA	83	Intergenic	10314632
Candidate5	chr1	miR-PREFeR	miRNA-precursor_170	469922689	469922803	.	+	.	ID=miRNA-precursor_170	NAME=New	TTTTTTGATCCTTAGGATGGC	21	CATCCTATGGATCAAGAAACG	21	GGCGCTGCCGGACGTTTTTTGATCCTTAGGATGGCCCGACACCTGAGCCCGAGCTGACCCCCGCTCAGGCACGTCTTCGGGCCATCCTATGGATCAAGAAACGCCCGACGGCGCA	115	Intergenic	7477599
Candidate6	chr1	miR-PREFeR	miRNA-precursor_174	477400402	477400543	.	+	.	ID=miRNA-precursor_174	NAME=New	AACTTGGTAGCAAAGCTGACA	21	TAAGCTCTGCTACCAAGTTGT	21	AGAACTGAGGGTCGTGACAACTTGGTAGCAAAGCTGACATTTTGTCTGTTATGCTTGACGCCATTGGACTATAATTTCTTCTGGATTCAAGTGCAGCAGAGATTGTAAGCTCTGCTACCAAGTTGTTGTGGTCCACAGTTCA	142	Intronic	-414336555
miR164b	chr2	ShortStack	Cluster_49072	63063988	63064200	.	+	.	ID=Cluster_49072	NAME=miR164c-3p	CACGTGTTCTTCTCCTCCATC	21	TGGAGAAGCAGGGCACGTGCA	21	GCTCCTCAGTCTCAGTGAGAAGATAGACAGACTACACTGCAAGAAACACTCGAAGGATCAGCGAGGAGGACCGCGCTGGAGAAGCAGGGCACGTGCATGCATGCGGGCGTGCTCGATCTCATCCTGCCTCCGTCGGTGGGATCGGAGCTGCTAGCCCTGCACTGCACTGCACGTGTTCTTCTCCTCCATCACGGTCTTTCCTCGCTCCGGAGC	213	Intergenic	385210413
miR827	chr2	ShortStack	Cluster_67522	448274613	448274812	.	-	.	ID=Cluster_67522	NAME=miR827-5p	TTAGATGACCATCAGCAAAC	20	TTTTGTTGGTTGTCATCTAACC	22	ACATGTTTGCTGATGGTCATCTAACCATCATCACCGTGTGTGTGTTGGCGTAATCGCCATGCACCCAGGCATCCATCCATGCACCAGGTGGCAGATCGAACGATGGTTAGATGACAACCAACAAAACAAGTTCAGAGCTGCACGAGCTAGAGATATCAAGATTGAGAGCCTAGGCAGAGGTGGAAGACGAGACCTGAGAT	200	Intergenic	57231248
miR399a	chr2	ShortStack	Cluster_70936	505506060	505506144	.	-	.	ID=Cluster_70936	NAME=miR399c-3p	TGCCAAAGGAGAGTTGCCCTG	21	GGGCTCCTCTTTATTGGCAGG	21	GTTACAGGGCAACTCTCCTTTGGCAGAGCGCTGAATGGAGCTACATGGCCTCACACGCTCCCTGCCAATAAAGAGGAGCCCTGAA	85	Intergenic	29752572
miR9679	chr2	ShortStack	Cluster_73075	535258716	535258930	.	-	.	ID=Cluster_73075	NAME=miR9679-5p	CAGAACCAGAATGAGTAGCTC	21	TCTGGTTTTAGATGCGCTTCC	21	TAGGAAGCGCATCTAAAACCAGAATGAGCAGCTCACATTCACTATGTTGAGTAGGTGCATGAGCTACTCATTCTGGTTCTGGAGGCGCCTCCTATGGTTTTAATTGTAGTCTCAGATCTCTGTATTAGCTGTGTTTTCCAAGCACCTTTGGCTTCAATAGCAGCAGTCTGCTCTTCTGCATCATCATATGAAGAGGACTCCAGATATGGATGCAC	215	Intergenic	2815407
miR169a	chr2	ShortStack	Cluster_73368	538074337	538074503	.	+	.	ID=Cluster_73368	NAME=miR169	CCTTGCTCTCTACCTCTGCTG	21	GAAAGAGGCAGAGAGTGGAATG	22	AATCGGAGTGAAGAGTTCGCTGCCGCAAGAGCCATGCAGAAAGAGGCAGAGAGTGGAATGCAGCCAAGGATGACTTGCCGACAGCACACAACAAGGTGGTAGTAATCTTGCCGGCAAGTCCGTCCTTGGCTACACCTTGCTCTCTACCTCTGCTGTGTGGCTTTTGC	167	Intergenic	26563242
miR9776	chr2	ShortStack	Cluster_75813	564637745	564637931	.	+	.	ID=Cluster_73368	NAME=miR9776	TGGACGAGGATGTGCAGCTGC	21	AGCTGCACATCCACGTCCAAG	21	TCATTCACGTACGACCCTAGTTAGAGTTTGGACGAGGATGTGCAGCTGCGGTAGGACTCTCAGCTACGACCGGCAGCTGCACATCCACGTCCAAGCGCTAGCTAGGATCGTCAACAACGGCCGGCAGCAGGACATCCATGTACGTGGAGGTTAATCTTGATAGGCGACGCCGAGTTCAGGAAGGTGA	187	5'UTR	61908520
miR396a	chr2	ShortStack	Cluster_83682	626546451	626546611	.	-	.	ID=Cluster_83682	NAME=miR396b-3p	TCCACAGGCTTTCTTGAACTG	21	GTTCAAGAAAGCCCATGGAAA	21	GGTTTCCATGGGCTTTCTTGAACCATCAACAGGCGGAGACGGCCGAAGAGAAGGCAGGAGCGCCACAATCCAGGGAATCCCCATCCCCGCGAGTTCACAGTTCAAGAAAGCCTGTGGAGAGCATGCCCGCGCATCTTTCCACGCCATATAATTCACAACCA	161	Intergenic	10379410
miR393	chr2	ShortStack	Cluster_85624	636926021	636926146	.	+	.	ID=Cluster_85624	NAME=miR393-5p	TTCCAAAGGGATCGCATTGAT	21	CAGTGCAATCCCTTTGGAATT	21	CTTTCAGGAAGCTAGTGGAGGATTCCAAAGGGATCGCATTGATCGATCTCTCCGTCATCGGCGTGCAAGGTCGATGGATCAGTGCAATCCCTTTGGAATTCTCCGCTCGCCTCCGCCTCCCTCCAT	126	Intergenic	-511130674
miR159	chr3	miR-PREFeR	miRNA-precursor_944	125795472	125795666	.	+	.	ID=miRNA-precursor_944	NAME=miR159	TTGGACTGAAGGGTGCTCCCT	21	AGAGCGTCCTTCAGTCCACTC	21	ATGGACGGAAGAGAGCGTCCTTCAGTCCACTCACGGGCGGTGCTAGGATCGAATTAGCTGCCGACTCATTCATCCACTTGCCGAGCAAAGTTATTTGCCGAGGAGCTTAGCAGGTGAGTGAATGAAGCGGGAGGTAAAGTCTTTGATCTCGCACCGTCGTTGCTTGGACTGAAGGGTGCTCCCTCCTCCTCTCTA	195	Intergenic	20749230
miR9676	chr3	ShortStack	Cluster_102965	146544896	146545034	.	+	.	ID=Cluster_102965	NAME=miR9676-5p	TACGGCCTGATGACATCCAC	20	GGATGTCATCGTGGCCGTACA	21	TCGGGAGCTTCACACCGTGGATGTCATCGTGGCCGTACATGAATCGTCCCCCACATCCAGCTCTGTTCAATTTCAGACAAAGGTGGACGTTTCATTGTACGGCCTGATGACATCCACAGCGTGGCTCTCCCAGAAACAG	139	Intergenic	191881739
miR319a	chr3	ShortStack	Cluster_109081	338426773	338426946	.	-	.	ID=Cluster_109081	NAME=miR319d-5p	TTGGACTGAAGGGTGCTCCCT	21	AGAGCTCTCTTCAGTCCACTC	21	GCAAGGGAGCACCCTTCAGTCCAACCACAAACAACGTCGAGCTAAATATTAGCTCCCGCGTCATCCAGTCGGCTACCAAGACATGCGCTCCGCCTTGGTTCTTGGTAGGTGAATGAATGAATCGGCAGCTAATAAAACCCTACAACCATCTGAGAGTGGACTGAAGAGAGCTCT	174	Intergenic	88317720
Candidate7	chr3	ShortStack	Cluster_113468	426744666	426744801	.	+	.	ID=Cluster_113468	NAME=New	TCAGGGAGTTGTGCTGACTTG	21	AGTCAACGCAACCCCCCGAGC	21	AAGTCAACGCAACCCCCCGAGCTTTAAAGTACCCAATATTGTTCAACAACATCCGCGGGGTTGTATTTAAACAGTATTTACTACACTGAGGGGTTGCTTAGACGGTTTTAAAGCTCAGGGAGTTGTGCTGACTTGG	136	Intronic	105399075
miR398a	chr3	ShortStack	Cluster_120737	532143876	532144031	.	-	.	ID=Cluster_120737	NAME=miR398	GGGTCGAGCTGGGAACACATG	21	TGTGTTCTCAGGTCGCCCCCG	21	ACACGCCTCGCCGATGACTGAGCATGCATCAAGCAGTCCATCTGTGGCGAGGAGGCTCCAGCGGGGGCGACCTGAGAACACATGAGTTGATAAGAGACGCTCGTCAATCAAGCGGTTCATATCTCATGTGTTCCCAGCTCGACCCCACAGGAATTT	156	Intronic	117338
miR398b	chr3	ShortStack	Cluster_120759	532261369	532261484	.	-	.	ID=Cluster_120759	NAME=miR398	AGGGTCGAACTGAGAACACAT	21	GTGTTCTCAGGTCGCCCCCG	20	TCTGCGGCGAGGAGGCTCCAGCGGGGGCGACCTGAGAACACATGAGTTAGTCGCTCGTCAATATATCTCATGTGTTCTCAGTTCGACCCTGCAGGAACTTCCTCGCATGTCCAATG	116		20450683
Candidate8	chr3	ShortStack	Cluster_122488	552712167	552712302	.	-	.	ID=Cluster_122488	NAME=New	TCTAATGGGGCTAGTCTAATT	21	TTAGACTAACCCCATAAGACA	21	CTGGTAGAGATATATATGTCACACCCAATTAATTAGACTAGCCCCATTAGACAGTCACTTACCGATATCCTGAATATTGGTAATACTAATTGCTGTGGAGGTATGCTGTAGTGACTGTCTTATGGGGTTAGTCTAA	136	UTR	-447073229
miR319b	chr4	ShortStack	Cluster_144406	105639073	105639368	.	+	.	ID=Cluster_144406	NAME=miR319l	TGGACTGAAGGGAGCTCCCTC	21	GGGAGCTCACTTCAGTCCACT	21	GAGCAGCAGCAGCAGGATGAGGATGATGATGATGATGATGAGGATGATGATGTATTAGTTTGAGGGAGCTCACTTCAGTCCACTCATGGGAGGTAGCGGGGATTGAACGAGCTGCCGACTCATTCACTCGAGCACACAGTAGATATGAGACTAGTCCAGGGCATACCAGTATGTTACAATATGTACTGTGCGAATGAGCGAATGCAGCGGGAGATTGTTCTCTCTTTCCTCCTCCATGCTTGGACTGAAGGGAGCTCCCTCATCTCTCATCAGCTTCATCAGGAATATGAACAGAC	296	Intergenic	251451500
Candidate9	chr4	miR-PREFeR	miRNA-precursor_628	357090868	357090971	.	-	.	ID=miRNA-precursor_628	NAME=New	TAACTGACGCGAGGAGACAAG	21	CGTGTCCTCGCATCAGTTATT	21	CTACTCCCTCCATTAGAAATAACTGATGCGAGGACACGAGATTTTGAACCGACAGTTCCAAATCTTGTCTCCTCGCGTCAGTTATTTCCGAACAGAGGGAGTAT	104	Intronic	76847514
Candidate10	chr4	miR-PREFeR	miRNA-precursor_645	433938485	433938667	.	+	.	ID=miRNA-precursor_645	NAME=New	ACGGCGGCGGCGACGTGGAGC	21	TCCCCGTCGTAGTCGTCGTCG	21	GCGTTGGAGGCGACGGCGGCGGCGACGTGGAGCATGGCGCGCGCCGCGAGGGGGCAGCATTGGAGGGAGCCCTCCACGGCCAGCGCCGGCGCGTGCTCGCCGTCGAGGCGGCCGTCCCGGAGGCACCTCACCGCCGCGTCCGCCATCTCAGCTCCCCGTCGTAGTCGTCGTCGTCGCCGGCGG	183		19198078
miR167a	chr4	ShortStack	Cluster_156937	453136745	453136979	.	+	.	ID=Cluster_156937	NAME=miR167d	TGAAGCTGCCAGCATGATCTGA	22	AGGTCATGTGGCAGCTTCATT	21	ATAGCTCTCTCTCTCTCTCTCTCTCTCTCTAGCTATCAAGATGATAGGTGGCAATTATGGCTTCGTTTGTGCACCACAAGTAGATGAAGCTGCCAGCATGATCTGAAAGCTAGCTATGTTGCATGTTGATCTTGATGGTCATCTCCATCAAGATTGAAGACCATGGGCATGGCTGCAATCAGGTCATGTGGCAGCTTCATTTTCTCATGGTAGTACACCCAGCTCGATGATGATG	235	Intergenic	2678811
miR166b	chr4	ShortStack	Cluster_157151	455815790	455816009	.	+	.	ID=Cluster_157151	NAME=miR166g-5p	TCGGACCAGGCTTCATTCCCC	21	GGAATGTTGTCTGGTTGGAGA	21	AGGGGAATGTTGTCTGGTTGGAGACCTGGCTCGCACGACGGATCGATCGGCGGCGGGCGTGCGCGCGCGGTTTCGGACCAGGCTTCATTCCCCCCAACTCAACCCTTCTTCCATCGGAGACGACGGGCAATCTCTGCAGCTTGTTTTGTTGGCCAAGCTGGGGATCGGAGCAGGCACCGCGTTTTCTTTGAGGTAAACCATCTGTCCCTCGCATATTGAT	220	Intergenic	57127394
miR9674a	chr4	ShortStack	Cluster_163761	512943403	512943520	.	-	.	ID=Cluster_163761	NAME=miR9674	ATGCTCTGGATAAACTCAACC	21	TTGAGTTTGTAGAGAGCATCC	21	ATCGGGTTGAGTTTATCCAGAGCATCAGCCATCTTAATCATCGTGCAAGAGGGTAGCAGGCTAGCAGCTACCACAGCTGGACGGCAGGATGGATGGATGCTCTCTACAAACTCAACCG	118	Intergenic	77	Potential Polycistronic miRNAs
miR9674b	chr4	ShortStack	Cluster_163762	512943597	512943861	.	-	.	ID=Cluster_163762	NAME=miR9674a-5p	ATAGCATCATCCATCCTACCA	21	GTAGGATGGCTGGTGCTATGG	21	AACCATCCGGTTGAATTTATCCATAGCACCAGCGCCAAAAGGCAGCAACTACTACCACCAGAGTTGAATGGCCGGTGCTGATGCTATGGAAAAATTCAACCAGAGGATTGGCTCCCTGCTTGACTTACGACGGACGGGGGTATGTCACCAACATCAGGTTGAAGCTATCCATAGCACCAGCCATCCTACCCACTGTTGGGCAGCAGCAGCCACCGTTGAATGGTAGGATGGATGATGCTATGGACAAATTCAACCAGAGGATTTT	265	Intergenic	54814
miR9674d	chr4	miR-PREFeR	miRNA-precursor_678	512998675	512998814	.	-	.	ID=miRNA-precursor_678	NAME=miR9674a-5p	ATAGCATCATCCATCCTACCA	21	GTAGGATGGCTGGTGCTATGG	21	GCAGAAGAAAGTCCTCTGGTTGAATTTGTCCATAGCATCATCCATCCTACCATTCAACGGCGGCTGCTGCTGCCCCACCGGTGGGTAGGATGGCTGGTGCTATGGATAGCTTCAACCCGATGTTCGTGC	129	Intergenic	1226	Potential Polycistronic miRNAs
miR9674e	chr4	miR-PREFeR	miRNA-precursor_676	513000040	513000140	.	-	.	ID=miRNA-precursor_676	NAME=miR9674a-5p	ATAGCATCATCCATCCTACCA	21	GTAGGATGGCTGGTGCTATGG	21	GGTTGAATTTGTCCATAGCATCATCCATCCTACCATTCAACGGTGGCTGCTGCTGCCCAACAGTGGGTAGGATGGCTGGTGCTATGGATAGCTTCAACC	99	Intergenic	-513000140
miR9674c	chr4					.	-	.		NAME=miR9674a-5p	ATAGCATCATCCATCCTACCA	21	GTAGGATGGCTGGTGCTATGG	21	TCCTCTGGTTGAATTTGCGCATAGCATCATCCATCCTACCATTCAACGGCGGCTGCTGCTGCCCCACCGGTGGGTAGGATGGCTGGTGCTATGGATGGCTTCAACCCGATGTTC	114	Intergenic	0
miR9674d	chr4					.	-	.		NAME=miR9674a-5p	ATAGCATCATCCATCCTACCA	21	GTAGGATGGCTGGTGCTATGG	21	TCCTCTGGTTGAATTTGCGCATAGCATCATCCATCCTACCATTCAACGGCGGCTGCTGCTGCCCCACCGGTGGGTAGGATGGCTGGTGCTATGGATGGCTTCAACCCGATGTTC	114	Intergenic	66982362
miR167b	chr5	ShortStack	Cluster_173234	66982362	66982546	.	-	.	ID=Cluster_173234	NAME=miR167e-3p	TGAAGCTGCCAGCATGATCTGA	22	AGGTCATGCTGGAGTTTCATC	21	GGTTTTCGTTGTGCTCCGACCAGCAGATGAAACTCCAGCATGACCTGATTGACATGGATTCTGATCCATGAGTTAGGTCATCAGATCATGCTGGCAGCTTCACCAGCTTGTGGTGCACCTTGATCTACCCACCAAAGAGAAAGGGGAATAACTCTGGTACTTTGGCGAGAGAGAGAGAGAGAGAG	185	Intergenic	2313	Potential Polycistronic miRNAs
miR167c	chr5	ShortStack	Cluster_173236	66984859	66984942	.	-	.	ID=Cluster_173236	NAME=miR167c-3p	TGAAGCTGCCAGCATGATCT	20	ATCATGACTGACAGCCTCATT	21	GAAGAAATGAGGCTGTCAGTCATGATCTAACAAGGATTCACACGCAGAAGCGAATCAAAGGTAGATCATGCTGGCAGCTTCACT	84	Intergenic	20156337
miR5718	chr5	ShortStack	Cluster_174276	87141279	87141463	.	-	.	ID=Cluster_174276	NAME=miR5718	TGGTCTGTGTTTGTTTCAAAC	21	TTGAGACGAAAACAGACCAAC	21	GACTCCGGTTGGTCTGTTTTCGTCTCAAACGAGGTGCAGCAACAAAGAGAGGCACAGGACGTACGCCTGACCACCTTGTTTGAAACAAACACAGACCAACCAGAGACTCCAGGGCGCGGAGGGAGAGGAATAGGGAGTCGCCGCGACTGCTGTAGGTCACGGTGGACGACATGGGGGCCGGTGGG	185	Intergenic	269690825
miR166c	chr5	ShortStack	Cluster_186108	356832288	356832428	.	+	.	ID=Cluster_186108	NAME=miR166-5p	TCGGACCAGGCTTCAATCCCT	21	GGGTTGTTGTCTGGTTCAAGG	21	TAAGGGGGTTGTTGTCTGGTTCAAGGTCTCCACATACATCATATACATGGAGAGCATGGTATATGGATTGTATGATTTGGTGATCTCGGACCAGGCTTCAATCCCTTTAACCAGCATCTGCACAATTCGTACTCCTCCTGC	141	Intergenic	174939320
miR390	chr5	miR-PREFeR	miRNA-precursor_848	531771748	531771902	.	-	.	ID=miRNA-precursor_848	NAME=miR390a-3p	AAGCTCAGGAGGGATAGCGCC	21	CGCTATCTATCCTGAGCTCCA	21	TGGTAAGAACAAACCGTGGAGCTCAGGATAGATAGCGCTTCGGACGAACAGATCGATGAACCATCAAGAGCCGGCCGGCCGGCCGGTCGGTCTCTTGCTGGTTGCAATAAACCTAGGCGCTATCCCTCCTGAGCTTCAAGGATTGTTCCCTACCC	155	Intergenic	27939146
miR169b	chr5	ShortStack	Cluster_210054	559711048	559711172	.	-	.	ID=Cluster_210054	NAME=miR169a-3p	TGGGCAAGTCACCCTGGCTACC	22	TAGCCAAGGATGATTTGCCTGTG	23	CATGGGGTGTGGTAAGAGGTACTCGGGTAGCCAGGGTGACTTGCCCATGGAACCGCCGGACGCCGCTCTCTGTGGCAGAGAGCTCGGCTGCCAAGGGAGTTTCACAGGCAAATCATCCTTGGCTA	125	Intergenic	4797
miR169c	chr5	ShortStack	Cluster_210058	559715969	559716168	.	-	.	ID=Cluster_210058	NAME=miR169j-3p	TGGGCAAGTCACCCTGGCTACC	22	TAGCCAAGGATGATTTGCCTGT	22	CTGATGATGAACGCCGGTCCTTGGGTGAATTCTGTTCAACACTAGGTAGGATGAATGAAATGAGCATGGGTCTGGCATGGGGTATGTTAAGAGGTGCTCGGGTAGCCAGGGTGACTTGCCCATGGAACCGCCGGACACCGCTCTCTGTGGCAGAGAGCTCGGCTGCCAAGGGAGTTTCACAGGCAAATCATCCTTGGCTA	200	Intergenic	-495199555
miR168	chr6	ShortStack	Cluster_18562	64516613	64516737	.	-	.	ID=Cluster_18562	NAME=miR168	TCGCTTGGTGCAGATCGGGAC	21	CCCGCCTTGCACCAAGTGAAT	21	TCGCTCGTCTCCTCCCCTCCCCGTCGCCGCCGCCTCGGGCTCGCTTGGTGCAGATCGGGACCCTCAGCCCGCCCCGACGGGCCGGATCCCGCCTTGCACCAAGTGAATCGGAGCCGGCGCAGCGACCAC	129	Intergenic	64312979
miR156a	chr6	miR-PREFeR		128829716	128829805	.	+	.		NAME=miR156	GCTCACTCCTCTTCCTGTCATC	22	TGACAGAAGAGAGTGAGCAC	20	GATTGACAGAAGAGAGTGAGCACATGGCGTGATGCCGGCATAACATGTATGCCGTCTTCGCCGCGTGCTCACTCCTCTTTCTGTCAGCC	89	Intergenic	17363947
miR167d	chr6	ShortStack	Cluster_227711	146193752	146193953	.	-	.	ID=Cluster_227711	NAME=miR167c-5p	TGAAGCTGCCAGCATGATCTGC	22	AGATCATGCTGCAGCTTCATT	21	TCTCTATATCTGTTGGTGGCCGTGAGAAAATGAAGCTGCAGCATGATCTGATGGAGCAAAAATTCCAAGATAACCCCGCGCAACCGAACGCGGTTTCGGCGCATGCTGGATGAGCAGATCATGCTGGCAGCTTCAGTCTCTCACACCAGCAAAGGCGTCCGTCCGTCCATGGTAGCAGAAGGACATGGAGCTACGCGGAGAT	202	Intergenic	164893887
miR156b	chr6	miR-PREFeR	miRNA-precursor_943	311087840	311087932	.	+	.	ID=miRNA-precursor_943	NAME=miR156	GCTCACTGCTCTTCCTGTCATC	22	TGACAGAAGAGAGTGAGCAC	20	CGGTGACAGAAGAGAGTGAGCACACGGCCGGTCGTTACGGCACCGCCCGGGTGTGCCGTCGCGGCCGCGTGCTCACTGCTCTTCCTGTCATCC	93	Intergenic	130449186
miR166d	chr6	ShortStack	Cluster_240312	441537118	441537240	.	+	.	ID=Cluster_240312	NAME=miR166f-3p	TCGGACCAGGCTTCATTCCCT	21	GGTATGTTGTCTGGCTCGGTG	21	GGTATGTTGTCTGGCTCGGTGCCCCCGGTCGAGGTCGATAGTCGTCGACTCCCTTCGCCGGGAGAAAGACGTGCATGTGCGTCGATTGATCGGGGACGTCGGACCAGGCTTCATTCCCTTTAA	123	Intergenic	11550169
miR164c	chr6	miR-PREFeR	miRNA-precursor_987	453087409	453087512	.	-	.	ID=miRNA-precursor_987	NAME=miR164a-3p	TGGAGAAGCAGGGCACGTGC	20	ACGTGCGCTCCTTCTCCAGC	20	CGGGGCGAGAAGCCATGCTGGAGAAGGAGCGCACGTGCTGCAACCGCTTTGGGTCGATGGATCGAGCACGTGCCCTGCTTCTCCAGCACCGTTCGCTCGCCCCT	104	Intergenic	19358281
miR396b	chr6	ShortStack	Cluster_244508	472445793	472445964	.	-	.	ID=Cluster_244508	NAME=miR396b-3p	TTCCACAGCTTTCTTGAACTG	21	GTTCAATAAAGCTGTGGGAAG	21	ATTGCCTCTCTCTCGAAACGCATCTACGCAGAACAATTGGCCTCTCACTGAGACTTCCCACAGCTTTATTGAACTGCCCGGCCGGCCTCTCGATCGCGCAGCTAGCAAGCCGAAGCGATCTAGCGAGAGGCAGATCCATGCGCGCATGCAGTTCAAGAAAGCTGTGGAAGAT	172	Intergenic	225598
miR9656	chr6	ShortStack	Cluster_244584	472671562	472671671	.	+	.	ID=Cluster_244584	NAME=miR9656-3p	CTTCGAGACTCTGAACAGCGG	21	ATTGTTCAGTGTTTCGAAGGA	21	CATTGTTCAGTGTTTCGAAGGAAATAATACCGTTGCTGGGTTTGGAGGACTGTTTTAACGGTATTATCTGCTTCGAGACTCTGAACAGCGGTGCCATAGAAGCTACTGCC	110	5'UTR	9931769
miR172a	chr6	ShortStack	Cluster_246462	482603440	482603592	.	-	.	ID=Cluster_246462	NAME=miR172a-5p	AGAATCTTGATGATGCTGCAT	21	GCAGCACCACCAAGATTCACA	21	TTCTTCTCATTGATCTCTCCAGCCAGGATGAGTCGAGTCGAGTGCCTGCTGATGCAGCATCATCAAGATTCTCATCACCTGGCGCGTCGCATAAATTTGATTTTACGACGGATCCGATGTGAATCTTGGTGGTGCTGCACCTGCAAGAACCGA	153	Intergenic	6398186
miR6201	chr6	ShortStack	Cluster_247630	489001778	489001945	.	+	.	ID=Cluster_247630	NAME=miR6201-5p	TGACCCTGAGGCACTCATACCG	22	GTACGAGTGTCTCAGGGTCAAG	22	AACTATCACTCACACGGTCTCTTCTCTCCTTCCGGCCACCCGAGTTTGACCCTGAGGCACTCATACCGCCAGCAAGTTCAAAATGCTAGCTGTATGAGTGCGTCAGGTAGCGGTACGAGTGTCTCAGGGTCAAGCTTCGGTTGCTAGAAAAACAACGGCAACAAAGGC	168	5'UTR	-489001945
miR169d	chr6					.	-	.			TGGGCAAGTCACCCTGGCTACC	22	TAGCCAAGGATGATTTGCCTGTG	23	AGGCCATCTTCGATAGCCAAGGATGATTTGCCTGTGAAACTCCCTTGGCAGCCGAGCTCTCTGCCACAGAGAGCGGTGTCCGGCGGTTCCATGGGCAAGTCACCCTGGCTACCCGAGCACCTCT	124	Intergenic	67935491
miR5200a	chr7	ShortStack	Cluster_260331	67935491	67935574	.	+	.	ID=Cluster_260331	NAME=miR5200	TAAGCCTTAGTGAATATCTAC	21	AGATACTCCCCAAGGCTTGGG	21	TAAGCCTTAGTGAATATCTACATTAGTAAGTGTTTCTTCATGTTGGAAATGCTTAGCATTGTAGATACTCCCCAAGGCTTGGGT	84	Intergenic	502	Potential Polycistronic miRNAs
miR5200b	chr7	ShortStack	Cluster_260332	67936076	67936164	.	+	.	ID=Cluster_260332	NAME=miR5200	TAGATACTCCCTAAGGCTTGG	21	GAGCCTTAGTGAATATCTACA	21	AGCAATCGAGCCTTAGTGAATATCTACACCAGTAAGTTTTTTTCTTCATGCCAGAAATACTAACAGTGTAGATACTCCCTAAGGCTTGGTGGTAT	95	Intergenic	649	Potential Polycistronic miRNAs
miR5200c	chr7	ShortStack	Cluster_260332	67936813	67936905	.	+	.	ID=Cluster_260332	NAME=miR5200	TAGATACTCCCTAAGGCTTGG	21	AAGCCTTAGTGAATATCTACA	21	GCACTAAAGCCTTAGTGAATATCTACACTAGTAAGTTTTTCTTCATGCTGGAAATGCTTAGCATTGTAGATACTCCCTAAGGCTTGGGTGGTA	93	Intergenic	83273635
Candidate11	chr7	ShortStack	Cluster_267943	151210540	151210765	.	+	.	ID=Cluster_267943	NAME=New	AGTCTCTGCCAATTCTTCGTG	21	CGAAGGATTTGCAGATACTCC	21	CCTCTCGTCTGGATCTCAGCCGCCGCACCCGAAACACGCCCAGAGCGCCCTCCGGATCTGGCTGACGCACGAAGTGACTCAAAGCAAAGAGCGCGAAGGAGCGCCGTCCGGATCTGGCTGACGCACGAAGTGGCTCAAAGCAAAGATTGCGAAGAGCGCGAAGGATTTGCAGATACTCCGTAAAATCACTTTATGGAGTCTCTGCCAATTCTTCGTGTTCTTAACG	226	Intergenic	49691067
miR160	chr7	ShortStack	Cluster_271355	200901832	200902025	.	+	.	ID=Cluster_271355	NAME=miR160	TTGCCTGGCTCCCTGAATGCC	21	CATTGAGGGAGTCATGCAGGC	21	CATTGTATTGCCGGGGTGCAGCTTAGCCGTGTATGGATGAATCGACGGTGCAGTCCAGCCTGATGCAAAAGGTTAGTTAGTGCATGTATGGCTGGCTGGTGCCGCTTGCCTGGCTCCCTGAATGCCATCCGAGAAGCGCGCCACTGTGTGAGGCGTCCCTCCTGGTTGGCATTGAGGGAGTCATGCAGGCCTCG	194	Intronic	276864783
miR399b	chr7	ShortStack	Cluster_281596	477766808	477766988	.	-	.	ID=Cluster_281596	NAME=miR399b-5p	TGCCAAAGGAGAATTGCCCTG	21	GTGCAGTTCTCCTCTGGCATG	21	TTAAGTGTACGAACCATTCCACCTTTGGGCTTGCAAATAGCAGTGTCCCATGACAAAGAGCAAGATCAAAGCAGGGTTTATACTGAATGGCAGGGCAATTCTCCTTTGGCAGGGAAGGTGATAGCATAGGCCATTTTCCAGGACCTGCTACATTGGCATCCATGCCAGAGGAGAACTGCAC	181		21345063
miR171b	chr7	ShortStack	Cluster_282791	499112051	499112135	.	-	.	ID=Cluster_282791	NAME=miR171e-5p	TTGAGCCGTGCCAATATCTCT	21	CGATATTGGTGAGGTTCAATC	21	GGGAGAGATATTGGCACGGCTCAATCAGATACTGGTCTTACCACGATTGTAAGACCTAGCATCGGATTGAACCTCACCAATATCG	85	Intergenic	76623622
miR408	chr7	ShortStack	Cluster_289928	575735757	575735943	.	+	.	ID=Cluster_289928	NAME=miR408-5p	CTGCACTGCCTCTTCCCTGCC	21	CAGGGATGGAGCAGAGCAAG	20	AGGAGACAGGGATGGAGCAGAGCAAGGGATGGGGCAAACAACAAACTTCAACTGCTTCCTTCCACTGATCACCTCCTGATTATATGACAAGAGCGAGAGAGTTGTGAGAGATGAGAGCTTTTGTTATTGTTGTTGTTGTTGCTCCCTCCCTGCACTGCCTCTTCCCTGCCTCCCCTCCCATCTAACT	187	Intergenic	-575735943
